# Supplementary material
Source: PubMed Central journal article supplement (PMC3338130)
Supplement: NIHMS369334-supplement-SI.pdf [file NIHMS369334-supplement-SI.pdf]

# Supplementary material for Speeding up direct $^{15}\text{N}$ detection: hCaN 2D NMR experiment

**Publication type:** JBNMR

**Authors:** <sup>1</sup>Maayan Gal, <sup>1\*</sup>Katherine A. Edmonds, <sup>1\*</sup>Alexander G. Milbradt, <sup>2</sup>Koh Takeuchi and <sup>1</sup>Gerhard Wagner

*Affiliations:*

<sup>1</sup>*Department of Biochemistry and Molecular Pharmacology, Harvard Medical School, Boston, MA 02115.*

<sup>2</sup>*Biomedical Information Research Center, National Institute of Advanced Industrial Science and Technology, Tokyo 135-0064, Japan*

\* These authors have contributed equally

**Corresponding author:** Gerhard Wagner

Department of Biochemistry and Molecular Pharmacology, Harvard Medical School, 240 Longwood Avenue, Boston, MA 02115, USA.

Tel.: (617) 432 3213, Fax: (617) 432 4383, e-mail: gerhard\_wagner@hms.harvard.edu

## Bruker pulseprogram: hCaN 2D NMR experiment

```
;3D sequence with
; 15N detected experiment
; F2(Ca, t1) -> F1(N,t2)
;on/off resonance 13C pulses using shaped pulses
;phase sensitive STATES-TPPI(t1)
;f1:N, f2:H, f3:C, f4:D
;prosol relations=<triple_c>

#include <Avance.incl>
#include <Grad.incl>
#include <Delay.incl>

"p2=p1*2"
"p4=p3*2"

"d11=30m"
"d12=20u"

"d21=11.3m"
"d22=14.3m"
"d23=11.3m"

;definition for constant time for t1
"d31=d22/2-p12/2" ;delay 1 for Ca constant time
"d30=d22-d21-p1" ;delay 2 for Ca constant time
"d29=d21-d22/2-p12/2-p1" ;delay 3 for Ca constant time
"d28=d22/2-p12/2" ;delay 4 for Ca constant time

;definition for nitrogen transverse delays
"d27=d23/2-p12/2"
"d26=d27-d12-4u"
"d14 = 1/(4*cnst4)";
" d13 = d14 - 0.5*p12"
"d25 = d28 - d13"

"in31=in0/4"
"in30=0"
"in29=in0/4"
;"in28=in0/4"
"in25=in0/4"

;cnst21: CO chemical shift (offset, in ppm)
;cnst22: Calpha chemical shift (offset, in ppm)

"d4=1/(4*cnst4)"
"d2=d4-d3";0.529*p6";10u";d4-0.5*p7-1000u";;0.53*p6";-0.5*p7

"spoff23=0"
"spoff24=0"
"spoff25=0"
"spoff26=bf3*((cnst21-cnst22)/1000000)"
"spoff15=bf3*((cnst21-cnst22)/2000000)"
```

```

1 ze
d11 p116:f3
d11 LOCKDEC_ON
d11 p117:f4
2 d11 do:f2 do:f3 do:f4
3 d11 H2_LOCK
9m LOCKH_OFF
d1 p11:f1 p12:f2 p10:f3
50u UNBLKGRAD
d12 H2_PULSE
5u
d12 fq1:f4 ;D-alpha
d12 ;cpd4:f4 ;cpd2:f2
5u

(p1 ph1):f1
(p12:sp24 ph1):f3
p16:gpl
50m

;***** 1H--Ca INEPT*****
(p3 ph4):f2
d4
(center (p4 ph1):f2 (p12:sp24 ph1):f3 );
d4
(p3 ph2):f2
;*****HzCz*****

;**** Ca --> N detection*****;
(p11:sp23 ph3:r):f3 ; a90 Q5 ;Ca indirect_____
d31
(center (p12:sp26 ph1):f3 (p4 ph1):f2);
d31
(p12:sp24 ph1):f3 ; Ca180 Q3
d30
(p2 ph1):f1 ; N180
d29
(p12:sp26 ph8):f3
d13;
(p4 ph1):f2
d25 ;= d28 - d13
(p11:sp25 ph8):f3 ; a90tr Q5tr ;_____

4u do:f4 do:f2
5u
p16:gpl
d16 fq1:f4 ;D-N
20u p112:f2
20u cpd2:f2 cpd4:f4
5u

(p1 ph1):f1 ;Ny i->i+/-1 transfer____
d27
(p12:sp26 ph1):f3
d27
(center (p2 ph1):f1 (p12:sp24 ph1):f3)
d27

```

```

(p12:sp26 ph1):f3
d26
d12 p116:f3 ;p112:f2
4u BLKGRAMP
go=2 ph31 cpd3:f3

d11 do:f2 do:f3 do:f4 mc #0 to 2
F1PH(ip3, dd31 & id30 & id29 & id25)

    d11 do:f2 do:f3 do:f4
    d11 H2_LOCK
    d11 LOCKH_OFF
    d11 LOCKDEC_OFF

exit

ph4=0 2
ph1=0
ph2=1
ph3=0
ph5=0
ph31=0 2 ;ph31 follow ph3
ph8 = 0

;p11 : f1 channel - power level for pulse (default)
;p13 : f3 channel - power level for pulse (default)
;p112: f2 channel - power level for CPD/BB decoupling
;p116: f3 channel - power level for CPD/BB decoupling
;sp3: f2 channel - shaped pulse 180 degree (adiabatic)
;sp23: f1 channel - shaped pulse 90 degree (on resonance)
;sp24: f1 channel - shaped pulse 180 degree (on resonance)
;sp25: f1 channel - shaped pulse 90 degree (on resonance)
;
           for time reversed pulse
;sp26: f1 channel - shaped pulse 180 degree (C=0 off
resonance)
;sp27: f1 channel - shaped pulse 180 degree (Ca off
resonance)
;sp28: f1 channel - shaped pulse 180 degree (Ca on
resonance)
;p11: f1 channel - 90 degree shaped pulse
;p12: f1 channel - 180 degree shaped pulse
;p14: f2 channel - 180 degree shaped pulse for inversion
(adiabatic)
;d0 : incremented delay (F1 in 2D) [3
usec]
;d1 : relaxation delay; 1-5 * T1
;d11: delay for disk I/O [30
msec]
;d12: delay for power switching [20
usec]
;d21: 11.3m 1/8JaN delay for Ca evolution can be determined
by paropt
;d22: 14.3m 1/(2*JCAB)
;d23: 11.3m 1/8JaN delay for N evolution can be determined
by paropt
;o1p: Calpha chemical shift (cnst22)

```

```
;in0: 1/(1 * SW(Ca)) = DW(Ca)
;nd0: 1
;td1: number of experiments in F1
;FnMODE: States-TPPI (or TPPI) in F1
;cpd2: decoupling according to sequence defined by cpdprg2
;cpd3: decoupling according to sequence defined by cpdprg3
;pcpd2: f2 channel - 90 degree pulse for decoupling sequence
;pcpd3: f3 channel - 90 degree pulse for decoupling sequence
;cnst4: Ha-13Ca J coupling
;cnst21: CO chemical shift (offset, in ppm)
;cnst22: Calpha chemical shift (offset, in ppm)
;$Id: c_can_mq.2,v 1.1.4.1 2004/11/23 15:08:14 ber Exp $
```
